# Supplementary material for: Surgery of pancreas tumors in pediatric and adolescent patients: a single institution experience in South America
Source: Research Square preprint supplement (doi:10.21203/rs.3.rs-170614/v1), 2021-02-05
Supplement: Supplementary file 1 [file 516f8dacdc770f42a01d2877.xlsx]

## Sheet: Table 4. Clinical features in r
Table 4. Clinical features in relation to pathology
	Total	SPN	Pancreatoblastoma	NET/NEC
Number (%)	34 (100%)	29 (85.3%)	3 (8.8%)	2 (5.8%)
Sex
Male , n (%)	6 (17.6)	3 (10.3)	1 (33)	2 (100)
Female, n (%)	28 (82.4)	26 (89.7)	2 (67)	0
Age,* median (range), years	13.4 (3–18)	14.2 (7–18)	10 (5–18)	7 (3–11)
Tumor Location
Head	19 (55.9)	17 (58.6)	2 (67)	0
Body	5 (14.7)	4 (13.8)	1 (33)	0
Tail	10 (29.4)	8 (27.6)	0	2 (100)
Tumor diameter, median (range), cm	7.5 (2–13.5)	7.6 (2–13.5)	8 (4–10)	5.6 (2.7–8.5)
Surgery
Pancreaticoduodenectomy, n (%)	19 (55.9)	17 (55.6)	2 (66.7)	0
Distal pancreatectomy, n (%)	10 (29.4)	9 (11.1)	0	1 (50)
Central pancreatectomy, n (%)	4 (11.8)	3 (3.7)	1 (33.3)	0
Enucleation, n (%)	1 (2.9)	0	0	1 (50)
Follow -up, median (range), months	33.8 (0.5–138)	35.9 (0.5–138)	16.3 (0.9–46)	29.7 (11–48)
Status al follow-up
Alive, n (%)	30 (88.2)	27 (93.1)	2 (66.7)	1 (50)
Dead, n (%)	4 (11.8)	2 (6.9)	1 (33.3)	1 (50)
Abbreviations: SPN, Solid Pseudopapillary Neoplasm; NET, Neuroendocrine Tumor; NEC, Neuroendocrine Carcinoma.
*At the date of surgery
