# Supplementary material for: Surgery of pancreas tumors in pediatric and adolescent patients: a single institution experience in South America
Source: Research Square preprint supplement (doi:10.21203/rs.3.rs-170614/v1), 2021-02-05
Supplement: Supplementary file 2 [file 65040ffe7e85a6c425645a14.xlsx]

## Sheet: Table 1. Demographic characteri
Table 1. Demographic characteristics in 34 patients who underwent resection of pancreas
Characteristic	Value
Patient factors
Age, * median (range), years	13.4 (3–18)
<10, n (%)	4 (11.8)
≥10, n (%)	30 (88.2)
Sex, male : female, n (%)	6 (17.6) : 28 (82.4)
Symptoms
Abdominal pain, n (%)	25 (73.5)
With nausea and vomiting, n (%)	8 (23.5)
With jaundice, n (%)	4 (11.8)
With weight loss, n (%)	2 (5.9)
Palpation of Intraabdominal mass, n (%)	3 (8.8)
Cushing syndrome, n (%)	1 (2.9)
None, n (%)	5 (14.7)
n: number of patients
*At the date of surgery
