# Supplementary material for: Surgery of pancreas tumors in pediatric and adolescent patients: a single institution experience in South America
Source: Research Square preprint supplement (doi:10.21203/rs.3.rs-170614/v1), 2021-02-05
Supplement: Supplementary file 3 [file 7cd9b164cba9edc4b6edbfbf.xlsx]

## Sheet: Supplementary Table 2. Demograp
Supplementary Table 2. Demographic and clinicopathologic characteristics in 29 patients with solid pseudopapillary neoplasm who underwent resection of pancreas
	Value
Patient factors
Age,* median (range), years	14.2 (7–18)
Sex, male : female, n (%)	3 (10.3) : 26 (89.7)
Symptoms
Abdominal pain, n (%)	24 (82.8)
With nausea and vomiting, n (%)	8 (27.6)
With jaundice, n (%)	3 (10.3)
With weight loss, n (%)	2 (6.9)
Palpation of Intraabdominal mass, n (%)	2 (6.9)
None, n (%)	3 (10.3)
Surgical procedures
Pylorus-preserving pancreaticoduodenectomy, n (%)	16 (55.1)
Classic pancreaticoduodenectomy, n (%)	1 (3.4)
Distal pancreatectomy (with splenectomy), n (%)	6 (20.6)
Spleen-preserving distal pancretatecomy, n (%)	3 (10.3)
Central pancreatectomy, n (%)	3 (10.3)
Anastomosis of pancreas stump	20 (100)
Pancreatico-jejunal anastomosis, n (%)	20 (100)
Duct to Mucosa, n (%)	9 (45)
Modified Telescopic , n (%)	11 (55)
Operative time, median (range),min	337 (125–570)
Estimated blood loss, median (range),mL	457 (20–3000)
Tumor diameter, median (range), cm	7.6 (2–13.5)
Tumor location
Head, n (%)	17 (58.6)
Body, n (%)	4 (13.8)
Tail, n (%)	8 (27.6)
Lymph node metastasis, n (%)	2 (6.9)
*At the date of surgery
