# Supplementary material for: Surgery of pancreas tumors in pediatric and adolescent patients: a single institution experience in South America
Source: Research Square preprint supplement (doi:10.21203/rs.3.rs-170614/v1), 2021-02-05
Supplement: Supplementary file 4 [file c0353377f346506f08f5ddbf.xlsx]

## Sheet: Table 2. Surgical and histopath
Table 2. Surgical and histopathologic outcomes
Characteristic	Value
Surgical Factors
Surgical procedures
Pylorus-preserving pancreaticoduodenectomy, n (%)	17 (50)
Classic pancreaticoduodenectomy, n (%)	2(6)
Distal pancreatectomy (with splenectomy), n (%)	6 (17.5)
Spleen-preserving distal pancretatecomy, n (%)	4 (11.8)
Central pancreatectomy, n (%)	4 (11.8)
Enucleation, n (%)	1 (2.9)
Anastomosis of pancreas stump	23 (67.6)
Pancreatic-jejunal anastomosis, n (%)	22 (64.6)
Duct to Mucosa, n (%)	11 (32.3)
Modified Telescopic, n (%)	11 (32.3)
Pancreatic-gastric anastomosis, n (%)	1 (2.9)
Operative time, median (range), min	343 (125–570)
Estimated blood loss, median (range),mL	440 (20–3000)
Histopathologic factors
Diagnosis
Solid pseudopapillary neoplasm, n (%)	29 (85.3)
Pancreatoblastoma, n (%)	3 (8.8)
Neuroendocrine Carcinoma, n (%)	1 (2.9)
Insulinoma, n (%)	1 (2.9)
Tumor diameter, median (range), cm	7.5 (2–13.5)
Tumor location
Head, n (%)	19 (55.9)
Body, n (%)	5 (14.7)
Tail , n (%)	10 (29.4)
Lymph node metastasis, n (%)	2 (5.9)
n: number of patients
